# Supplementary material for: Metagenomic insights into the metabolism of microbial communities that mediate iron and methane cycling in Lake Kinneret sediments
Source: Copernicus journal article supplement (doi:10.5194/bg-2020-329), 2020-09-10
Supplement: Supplementary file 1 [file bg-2020-329-supplement.pdf]

# Supplementary Material

## Metagenomic insights into the metabolism of microbial communities that mediate iron and methane cycling in Lake Kinneret sediments

Michal Elul\*, Maxim Rubin-Blum, Zeev Ronen, Itay Bar-Or, Werner Eckert, Orit Sivan

**\* Correspondence:**

Michal Elul, e-mail: elul@post.bgu.ac.il

### 1 Supplementary Methods

**Method S1:** Analysis of microbial diversity in slurry incubations based on the 16S rRNA gene amplicon sequencing.

Total genomic DNA was extracted from duplicate samples of the slurries using the MoBio Power Soil DNA isolation kit (MoBio Laboratories, Solana Beach, CA). Genomic DNA was eluted using 80 µl of elution buffer and stored at -20°C. Duplicates of 16S rRNA gene fragments were joined together and amplified by PCR using a Biometra T Gradient thermocycler (Biometra, Göttingen, Germany) for MiSeq sequencing. Linkered primers that were used are 41F/806R for bacteria: (CS1-341F: 5'-ACACTGACGACATGGTTCTACACCTACGGGAGGCAGCAG, CS2-806R:5'-TAC-GGTAGCAGAGACTTGGTCTGGACTACHVGGGTWTCTAAT) and Ar915- Ar1386 for archaea (CS1\_Ar915F:5'-ACACTGACGACATGGTTCTACAAGGAATTGGCGGGGGAGCAC, CS2\_Ar1386R: TACGGTAGCAGAGACTTGGTCTGCGGTGTGTGCAAGGAGC) for an 16S rRNA genes. All primer sets were used in PCR amplification in parallel with Dream Taq (Fermentas, Lithuania). From PCR protocol initial denaturation step of 2 min at 95°C was followed by 30 cycles of the following incubation pattern at 95°C for 20 s, 52/59°C for 20 s for bacteria or archaea, respectively, and 56°C for 65 s. A final extension at 65°C for 7 min completed the reaction.

Illumina MySeq sequencing of the PCR products was performed at DNA Services (DNAS) Facility (Research Resources Center University of Illinois at Chicago). Demultiplexed paired-end reads were analyzed using QIIME2 V2019.7 (Rideout et al. 2018). Reads were truncated based on quality plots, checked for chimeras, merged and grouped into amplicon sequence variants (ASVs) with DADA2 (Callahan et al. 2016), as implemented in QIIME2. A Naïve-Bayes classifier trained on the Silva 132 full 99%-clustered 16S rRNA sequences. Representative sequences were aligned with MAFFT (Katoh and Standley 2013), masked, and trees were generated using FastTree (Price et al. 2009), as implemented in QIIME2. Downstream statistical analyses and plotting were performed in R (R Core Team 2018), using libraries phyloseq (McMurdie and Holmes 2013), ampvis2 (Andersen et al. 2018) and ggplot2 (Wickham 2009).

## 2 Supplementary Figures

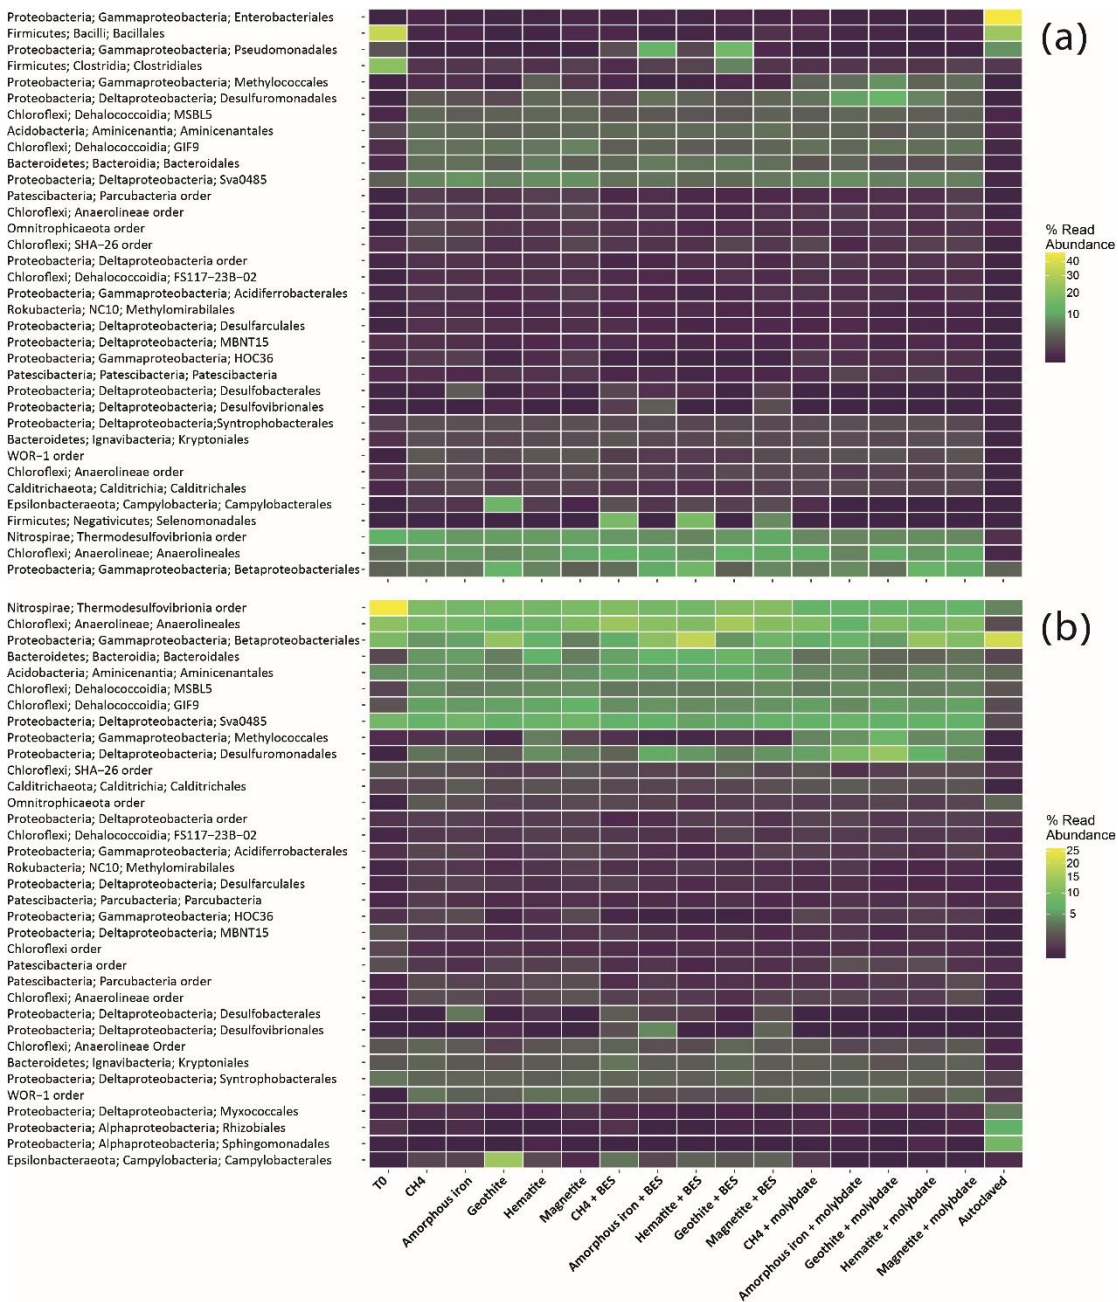

**Figure S1:** The relative abundance of bacteria (top 35) at the order level in Bar-Or et al. 2017 study, based on amplicon sequencing of the 16S rRNA genes, including (a) and excluding (b) the major contaminants.

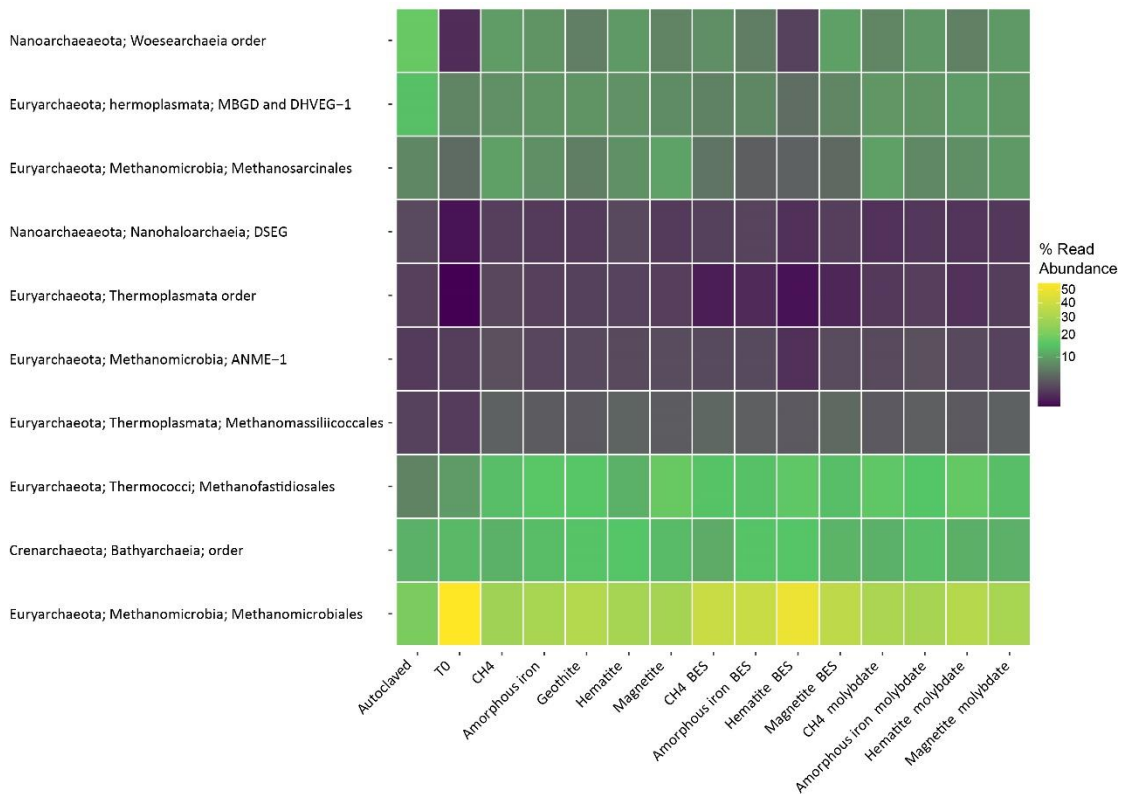

**Figure S2:** The relative abundance of Archaea (top 10) at the order level in Bar-Or et al. 2017 study based on amplicon sequencing of the 16S rRNA genes.

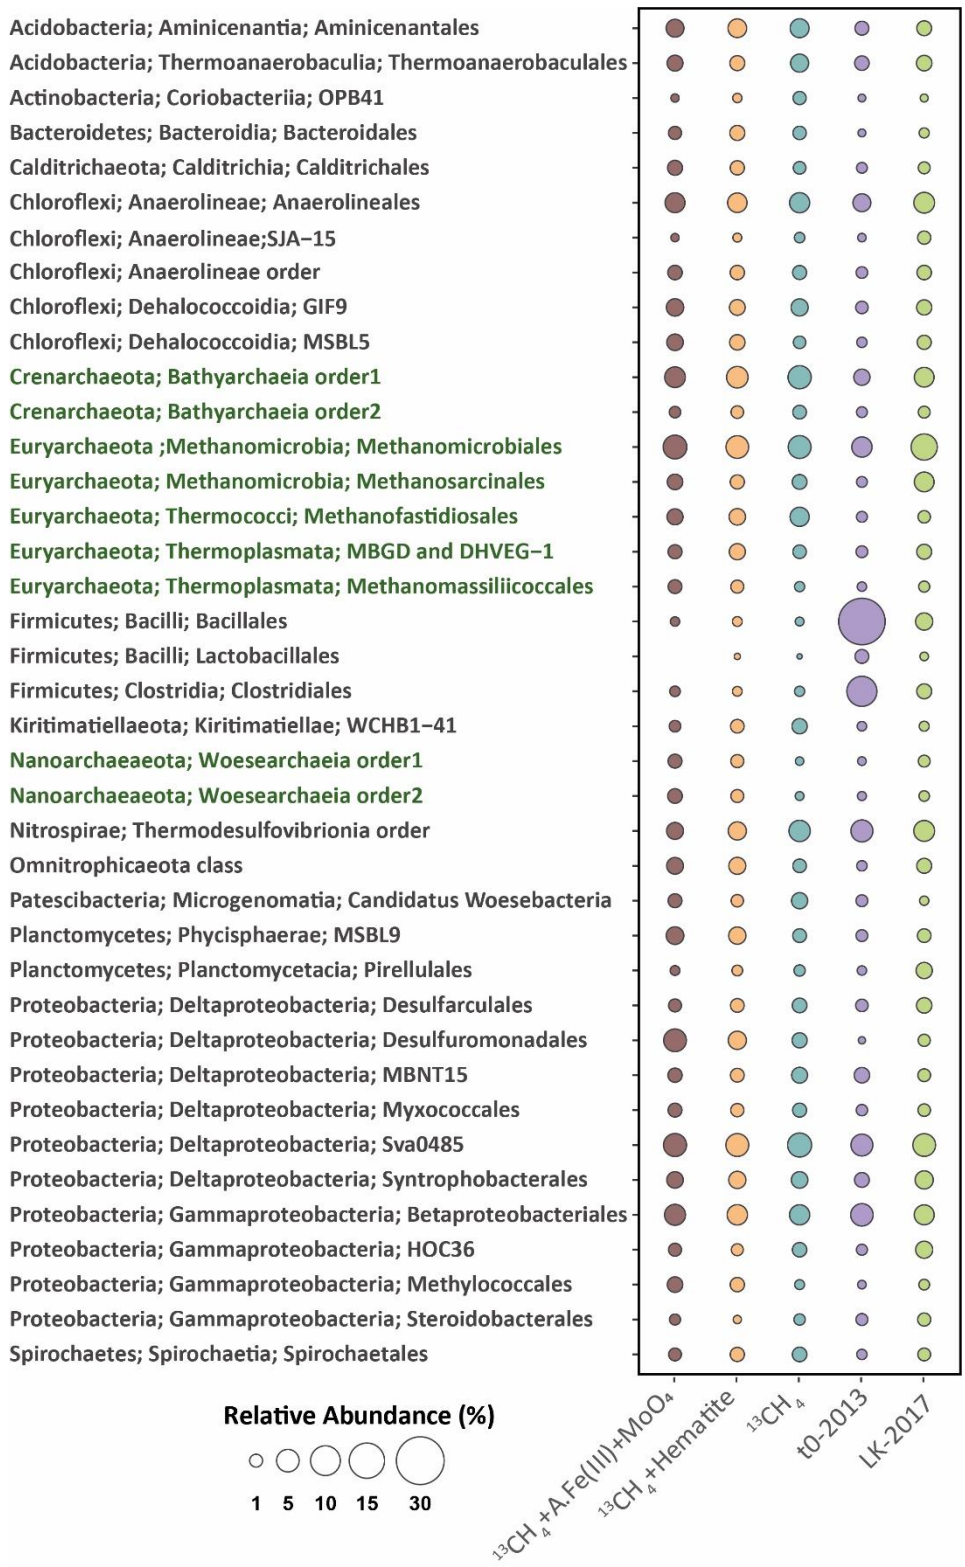

**Figure S3:** Relative abundance of Bacteria (black) and Archaea (green) at the order level in all five metagenomics libraries based on the mapping of metagenomic reads to the Silva132 database of the small subunit rRNA sequences. Contamination of common laboratory bacteria, such as Firmicutes and Clostridia are seen in sample t0-2013. Lineages <1%, which account together for 20-32% of the microbial community, were removed from the display.

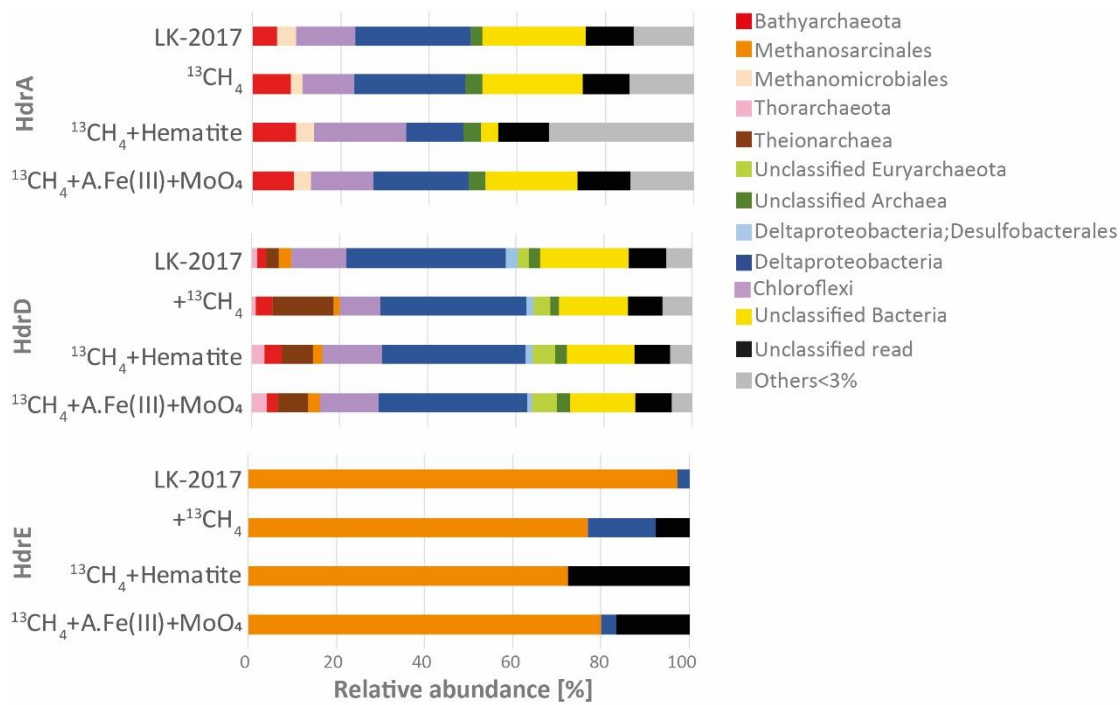

**Figure S4:** Phylogenetic diversity of HdrA, D and E subunits of the heterodisulfide reductase. Phylogenetic assignments are based on BLAST mapping against the RefSeq database. Taxonomic classifications at the highest level possible (up to the Order level) are shown. A.Fe(III)+Mo= amorphous iron and molybdate.

### 3 Supplementary Table

**Table S1:** The various treatments in all slurry incubations, from Bar-Or et al. 2017.

| Slurry label                                                                 | amorphous iron (0.1g) | goethite (0.1g) | hematite (0.1g) | magnetite (0.1g) | BES (0.5ml) | molybdate (0.5ml) |
|------------------------------------------------------------------------------|-----------------------|-----------------|-----------------|------------------|-------------|-------------------|
| Autoclaved after: <sup>13</sup> CH <sub>4</sub> +all iron minerals           | X<br>X                | X<br>X          | X<br>X          | X<br>X           |             |                   |
| Autoclaved after: <sup>13</sup> CH <sub>4</sub> +all iron minerals+BES       | X<br>X                | X<br>X          | X<br>X          | X<br>X           | X<br>X      |                   |
| Autoclaved after: <sup>13</sup> CH <sub>4</sub> +all iron minerals+molybdate | X<br>X                | X<br>X          | X<br>X          | X<br>X           |             | X<br>X            |
| <sup>13</sup> CH <sub>4</sub>                                                |                       |                 |                 |                  |             |                   |
| <sup>13</sup> CH <sub>4</sub> +BES                                           |                       |                 |                 |                  | X<br>X      |                   |
| <sup>13</sup> CH <sub>4</sub> +amorphous iron                                | X<br>X                |                 |                 |                  |             |                   |
| <sup>13</sup> CH <sub>4</sub> +amorphous iron+BES                            | X<br>X                |                 |                 |                  | X<br>X      |                   |
| <sup>13</sup> CH <sub>4</sub> +goethite                                      |                       | X<br>X          |                 |                  |             |                   |
| <sup>13</sup> CH <sub>4</sub> +goethite+BES                                  |                       | X<br>X          |                 |                  | X<br>X      |                   |
| <sup>13</sup> CH <sub>4</sub> +hematite                                      |                       |                 | X<br>X          |                  |             |                   |
| <sup>13</sup> CH <sub>4</sub> +hematite+BES                                  |                       |                 | X<br>X          |                  | X<br>X      |                   |
| <sup>13</sup> CH <sub>4</sub> +magnetite                                     |                       |                 |                 | X<br>X           |             |                   |
| <sup>13</sup> CH <sub>4</sub> +magnetite+BES                                 |                       |                 |                 | X<br>X           | X<br>X      |                   |
| <sup>13</sup> CH <sub>4</sub> +molybdate                                     |                       |                 |                 |                  |             | X<br>X            |
| <sup>13</sup> CH <sub>4</sub> +amorphous iron+molybdate                      | X<br>X                |                 |                 |                  |             | X<br>X            |
| <sup>13</sup> CH <sub>4</sub> +goethite+molybdate                            |                       | X<br>X          |                 |                  |             | X<br>X            |
| <sup>13</sup> CH <sub>4</sub> +hematite+molybdate                            |                       |                 | X<br>X          |                  |             | X<br>X            |
| <sup>13</sup> CH <sub>4</sub> +magnetite+molybdate                           |                       |                 |                 | X<br>X           |             | X<br>X            |

## 4 Electronic Supplementary Databases

**S.DB.1**| Microbial composition of Lake Kinneret sediments and slurry incubations based on SILVA (V132) database -Taxonomic classification (up until genus level) and abundance (in percentage) based on metagenomic reads to SILVA (V132) database. Eukaryote, Chloroplast, Mitochondria sequences were removed before normalization.

**S.DB.2**| Microbial composition of Lake Kinneret sediments and slurry incubations based on MAR (MARine) database -Microbial abundance based on read mapping to MAR (MARine) database of prokaryotic genomes. <https://doi.org/10.6084/m9.figshare.11800875.v1>

**S.DB.3**| Abundance and classification of genes in Lake Kinneret sediments and slurry incubations based on KEGG orthology (in units of counts per million (CPM)).

**S.DB.4**| ANME2d Multiheme c-type cytochromes (MHC) sequences used as a query for BLASTing against Lake Kinneret sediment metagenome.

**S.DB.5**| Abundance (in units of counts per million (CPM)) of genes encoding for F420:methanophenazine dehydrogenase complex (*fpoABCDHIJKLMNO*) in Lake Kinneret sediments and slurry incubations.

## References

- Andersen, K. S., R. H. Kirkegaard, S. M. Karst, and M. Albertsen. 2018. ampvis2: an R package to analyse and visualise 16S rRNA amplicon data. bioRxiv 299537. doi:10.1101/299537
- Bar-Or, I., M. Elvert, W. Eckert, A. Kushmaro, H. Vigderovich, Q. Zhu, E. Ben-Dov, and O. Sivan. 2017. Iron-coupled anaerobic oxidation of methane performed by a mixed bacterial-archaeal community based on poorly reactive minerals. Environ. Sci. Technol. **51**: 12293–12301. doi:10.1021/acs.est.7b03126
- Callahan, B. J., P. J. McMurdie, M. J. Rosen, A. W. Han, A. J. A. Johnson, and S. P. Holmes. 2016. DADA2: High-resolution sample inference from Illumina amplicon data. Nat. Methods **13**: 581–583. doi:10.1038/nmeth.3869
- Katoh, K., and D. M. Standley. 2013. MAFFT multiple sequence alignment software version 7: Improvements in performance and usability. Mol. Biol. Evol. **30**: 772–780. doi:10.1093/molbev/mst010
- McMurdie, P. J., and S. Holmes. 2013. Phyloseq: An R package for reproducible interactive analysis and graphics of microbiome census data. PLoS One **8**. doi:10.1371/journal.pone.0061217
- Price, M. N., P. S. Dehal, and A. P. Arkin. 2009. Fasttree: Computing large minimum evolution trees with profiles instead of a distance matrix. Mol. Biol. Evol. **26**: 1641–1650. doi:10.1093/molbev/msp077
- R Core Team. 2018. R: A Language and Environment for Statistical Computing.
- Rideout, J. R., M. R. Dillon, N. A. Bokulich, and others. 2018. QIIME 2 : Reproducible , interactive , scalable , and extensible microbiome data science. PeerJ Prepr. doi:10.7287/peerj.preprints.27295
- Wickham, H. 2009. ggplot2: Elegant Graphics for Data Analysis, Springer-Verlag.
